# Supplementary material
Source: Research Square preprint supplement (doi:10.21203/rs.3.rs-7799069/v1)
Supplement: Supplementary file 1 [file 36a7c14abe11f084d7ff0f2b.pdf]

## Balancing organic agriculture expansion target and climate goals in Europe without outsourcing emissions is possible

### Supplementary Material B : land use and greenhouse gas emissions (figures 2 and 3)

Noélie Borghino\*, Chantal le Mouél, Agneta Forslund, Pietro Barbieri, Florence Garcia-Launay, Guillaume Martin, Bertrand Méda, Bertrand Dumont, Patrick Meyfroidt, Alice Josserand, Thomas Nesme

Source : Authors' calculations

#### Data Figure 2 - land use in Europe

| Scenario | Organic variant | land use            | Area (Million ha) |
|----------|-----------------|---------------------|-------------------|
| 2010     |                 | cropland            | 127.0918          |
| 2010     |                 | permanent grassland | 71.8356305        |
| 2010     |                 | shrubland           | 23.13506453       |
| 2010     |                 | forest              | 203.2565564       |
| REF      |                 | cropland            | 146.8366346       |
| REF      |                 | permanent grassland | 67.56829894       |
| REF      |                 | shrubland           | 13.75438853       |
| REF      |                 | forest              | 197.1597293       |
| OAU      | 25              | cropland            | 155.5703262       |
| OAU      | 25              | permanent grassland | 68.69657898       |
| OAU      | 25              | shrubland           | 13.75438853       |
| OAU      | 25              | forest              | 187.2977577       |
| OAU      | 50              | cropland            | 169.5058012       |
| OAU      | 50              | permanent grassland | 71.55450317       |
| OAU      | 50              | shrubland           | 13.05272311       |
| OAU      | 50              | forest              | 171.206024        |
| CIRC     | No expansion    | cropland            | 127.5972168       |
| CIRC     | No expansion    | permanent grassland | 56.7682823        |
| CIRC     | No expansion    | shrubland           | 37.69699591       |
| CIRC     | No expansion    | forest              | 203.2565564       |
| CIRC     | 25              | cropland            | 135.82223         |
| CIRC     | 25              | permanent grassland | 61.05326807       |
| CIRC     | 25              | shrubland           | 25.18699699       |
| CIRC     | 25              | forest              | 203.2565564       |
| CIRC     | 50              | cropland            | 148.8327082       |
| CIRC     | 50              | permanent grassland | 67.04414663       |
| CIRC     | 50              | shrubland           | 15.02365329       |
| CIRC     | 50              | forest              | 194.4185433       |
| DIV      | 0               | cropland            | 127.5972168       |
| DIV      | 0               | permanent grassland | 56.7682823        |

|       |                        |             |
|-------|------------------------|-------------|
| DIV   | 0 shrubland            | 37.69699591 |
| DIV   | 0 forest               | 203.2565564 |
| DIV   | 25 cropland            | 135.5630608 |
| DIV   | 25 permanent grassland | 62.41629671 |
| DIV   | 25 shrubland           | 24.08313748 |
| DIV   | 25 forest              | 203.2565564 |
| DIV   | 50 cropland            | 148.5798273 |
| DIV   | 50 permanent grassland | 64.63101109 |
| DIV   | 50 shrubland           | 16.30219903 |
| DIV   | 50 forest              | 195.8060141 |
| VEGET | 0 cropland             | 126.1493584 |
| VEGET | 0 permanent grassland  | 53.57363551 |
| VEGET | 0 shrubland            | 42.33950113 |
| VEGET | 0 forest               | 203.2565564 |
| VEGET | 25 cropland            | 133.1070516 |
| VEGET | 25 permanent grassland | 58.91652567 |
| VEGET | 25 shrubland           | 30.03891775 |
| VEGET | 25 forest              | 203.2565564 |
| VEGET | 50 cropland            | 142.4225072 |
| VEGET | 50 permanent grassland | 59.7624414  |
| VEGET | 50 shrubland           | 21.20605033 |
| VEGET | 50 forest              | 201.9280525 |
| PLANT | 0 cropland             | 122.275267  |
| PLANT | 0 permanent grassland  | 53.30634424 |
| PLANT | 0 shrubland            | 46.48088382 |
| PLANT | 0 forest               | 203.2565564 |
| PLANT | 25 cropland            | 133.7615629 |
| PLANT | 25 permanent grassland | 52.51889169 |
| PLANT | 25 shrubland           | 35.7820404  |
| PLANT | 25 forest              | 203.2565564 |
| PLANT | 50 cropland            | 150.5892856 |
| PLANT | 50 permanent grassland | 46.58076915 |
| PLANT | 50 shrubland           | 24.89244026 |
| PLANT | 50 forest              | 203.2565564 |

### Data Figure 3. Greenhouse gas emissions

#### Europe

| Scenario | Organic variant | Agriculture emissions (Mt CO <sub>2</sub> eq per year) | LUC emissions (Mt CO <sub>2</sub> per year) |
|----------|-----------------|--------------------------------------------------------|---------------------------------------------|
| REF      |                 | 474                                                    | 76                                          |
| OAU      | 25%             | 472                                                    | 135                                         |
| OAU      | 50%             | 470                                                    | 229                                         |
| CIRC     | No expansion    | 282                                                    | -2                                          |
| CIRC     | 25%             | 302                                                    | 23                                          |
| CIRC     | 50%             | 359                                                    | 90                                          |
| DIV      | No expansion    | 282                                                    | -2                                          |

|       |              |     |     |
|-------|--------------|-----|-----|
| DIV   | 25%          | 294 | 22  |
| DIV   | 50%          | 320 | 85  |
| VEGET | No expansion | 259 | -6  |
| VEGET | 25%          | 263 | 14  |
| VEGET | 50%          | 266 | 47  |
| PLANT | 0%           | 218 | -18 |
| PLANT | 25%          | 211 | 16  |
| PLANT | 50%          | 207 | 65  |

## Rest of the World

| Scenario | Organic variant | Agriculture emissions<br>(Mt CO <sub>2</sub> eq per year) | LUC emissions (Mt<br>CO <sub>2</sub> per year) |
|----------|-----------------|-----------------------------------------------------------|------------------------------------------------|
| REF      |                 | 6838                                                      | 1284                                           |
| OAU      | 25%             | 6844                                                      | 1289                                           |
| OAU      | 50%             | 6849                                                      | 1277                                           |
| CIRC     | No expansion    | 6743                                                      | 1157                                           |
| CIRC     | 25%             | 6736                                                      | 1128                                           |
| CIRC     | 50%             | 6697                                                      | 974                                            |
| DIV      | No expansion    | 6743                                                      | 1157                                           |
| DIV      | 25%             | 6745                                                      | 1162                                           |
| DIV      | 50%             | 6738                                                      | 1117                                           |
| VEGET    | No expansion    | 6730                                                      | 1140                                           |
| VEGET    | 25%             | 6732                                                      | 1145                                           |
| VEGET    | 50%             | 6734                                                      | 1144                                           |
| PLANT    | No expansion    | 6722                                                      | 1134                                           |
| PLANT    | 25%             | 6725                                                      | 1143                                           |
| PLANT    | 50%             | 6729                                                      | 1141                                           |

## Global

| Scenario | Organic variant | Agriculture emissions<br>(Mt CO <sub>2</sub> eq per year) | LUC emissions (Mt<br>CO <sub>2</sub> per year) |
|----------|-----------------|-----------------------------------------------------------|------------------------------------------------|
| REF      |                 | 7312                                                      | 1360                                           |
| OAU      | 25%             | 7316                                                      | 1424                                           |
| OAU      | 50%             | 7319                                                      | 1505                                           |
| CIRC     | No expansion    | 7025                                                      | 1156                                           |
| CIRC     | 25%             | 7037                                                      | 1150                                           |
| CIRC     | 50%             | 7056                                                      | 1065                                           |
| DIV      | No expansion    | 7025                                                      | 1156                                           |
| DIV      | 25%             | 7039                                                      | 1184                                           |
| DIV      | 50%             | 7058                                                      | 1202                                           |
| VEGET    | No expansion    | 6989                                                      | 1134                                           |
| VEGET    | 25%             | 6995                                                      | 1159                                           |
| VEGET    | 50%             | 7000                                                      | 1191                                           |
| PLANT    | No expansion    | 6940                                                      | 1116                                           |
| PLANT    | 25%             | 6936                                                      | 1159                                           |
| PLANT    | 50%             | 6935                                                      | 1206                                           |
